# Supplementary material for: The Secretomes of Aspergillus japonicus and Aspergillus terreus Supplement the Rovabio® Enzyme Cocktail for the Degradation of Soybean Meal for Animal Feed
Source: MDPI journal article supplement (doi:10.3390/jof7040278), 2021-04-07

## ***Supplementary Figures and Tables***

### **The secretomes of *Aspergillus japonicus* and *Aspergillus terreus* supplement the Rovabio® enzyme cocktail for the degradation of soybean meal for animal feed**

Delphine Grandmontagne<sup>1,2</sup>, David Navarro<sup>1,3</sup>, Virginie Neugnot-Roux<sup>2</sup>, Simon Ladevèze<sup>1,4</sup>,  
Jean-Guy Berrin<sup>1,\*</sup>

<sup>1</sup>INRAE, Aix Marseille Univ., BBF, UMR1163, 13009 Marseille, France

<sup>2</sup>ADISSEO, 135 avenue de Rangueil, INSA Toulouse, Hall Gilbert Durand, 31400 Toulouse,  
France

<sup>3</sup>CIRM-CF, INRAE, Aix Marseille Univ., 13009 Marseille, France

<sup>4</sup>Present address: University of Cambridge, Sanger Building, 80 Tennis Ct Rd, Cambridge CB2  
1GA, UK

\*Correspondence to: Jean-Guy Berrin ([jean-guy.berrin@inrae.fr](mailto:jean-guy.berrin@inrae.fr))

**Supplementary Table 1: Protein content of each produced and concentrated secretomes for Rovabio® enzymatic cocktail supplementation.** *Gymnopilus junonius* SBP data are missing as the secretome was too viscous and could not be collected and processed.

| Fungal strain                | Substrate | Protein concentration (mg/ml) |
|------------------------------|-----------|-------------------------------|
| <i>Absidia glauca</i>        | SBM       | 0.6                           |
|                              | SBP       | 0.4                           |
| <i>Gymnopilus junonius</i>   | SBM       | 1.5                           |
|                              | SBP       | -                             |
| <i>Lentinula edodes</i>      | SBM       | 0.4                           |
|                              | SBP       | 0.5                           |
| <i>Aspergillus terreus</i>   | SBM       | 3.4                           |
|                              | SBP       | 3.8                           |
| <i>Aspergillus japonicus</i> | SBM       | 4.3                           |
|                              | SBP       | 2.1                           |

**Supplementary Table 2: Presentation of different tested parameters in bioreactor experiments.**

| Bioreactor | Inoculum          | Sugar Beet Particles Size |
|------------|-------------------|---------------------------|
| F1         | $2.10^8$ spores/L | 3mm                       |
| F2         | $2.10^8$ spores/L | Micronized (<100 $\mu$ m) |
| F3         | $2.10^9$ spores/L | Micronized (<100 $\mu$ m) |

**Supplementary Figure 1 : Electrophoresis profiles of each secretomes used for Rovabio® enzymatic cocktail supplementation.** 10 µg of protein from each secretome were loaded onto a 15% Tris Glycine SDS-PAGE, and proteins were stained with Coomassie Blue. The molecular marker (Page Ruler) (M) are indicated on the left.

Secretomes of *Aspergillus terreus* SBM (lane 1), *Aspergillus terreus* SBP (lane 2), *Aspergillus japonicus* SBM (lane 3), *Aspergillus japonicus* SBP (lane 4), *Absidia glauca* SBM (lane 5), *Absidia glauca* SBP (lane 6), *Gymnopus junonius* SBM (lane 7), *Lentinula edodes* SBM (lane 8) and *Lentinula edodes* SBP (lane 9) are shown.

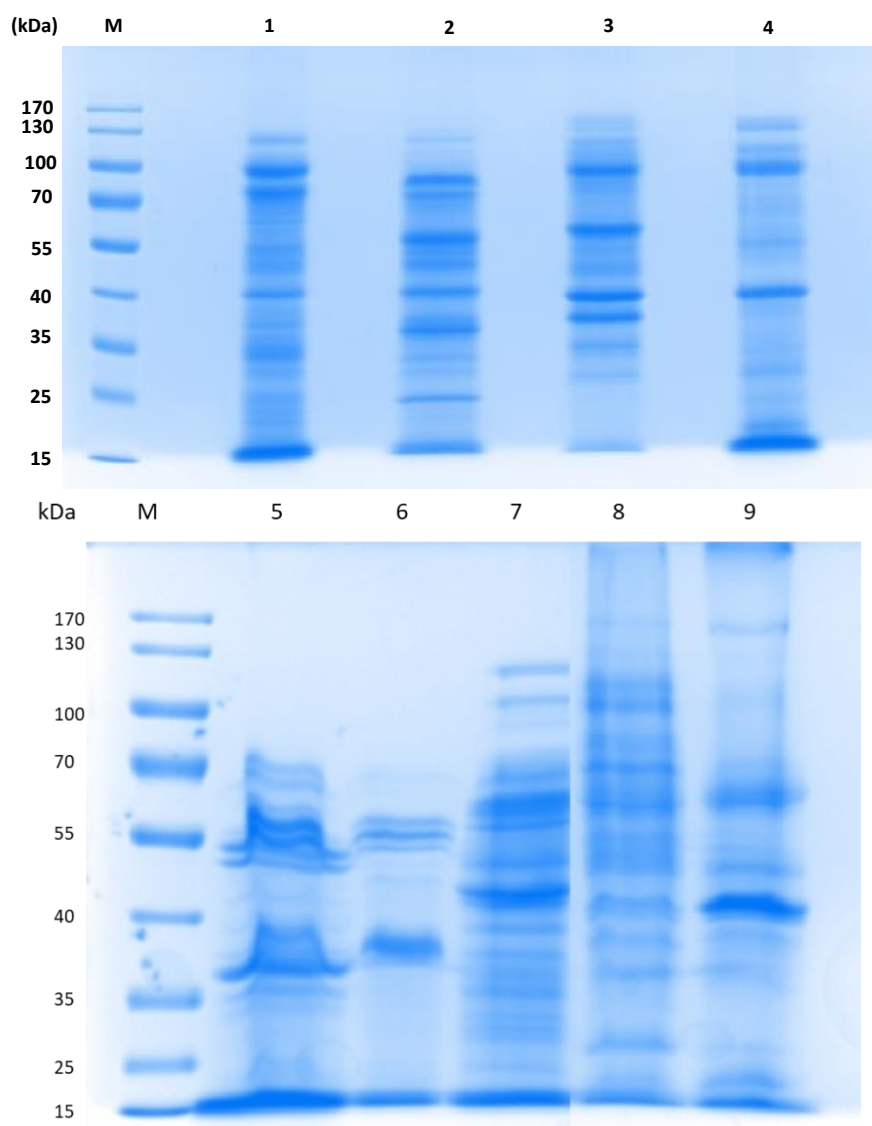

**Supplementary Figure 2: Solubilization of soybean meal using different amounts of Rovabio®.** The amount of protein was quantified using the Bradford assay.

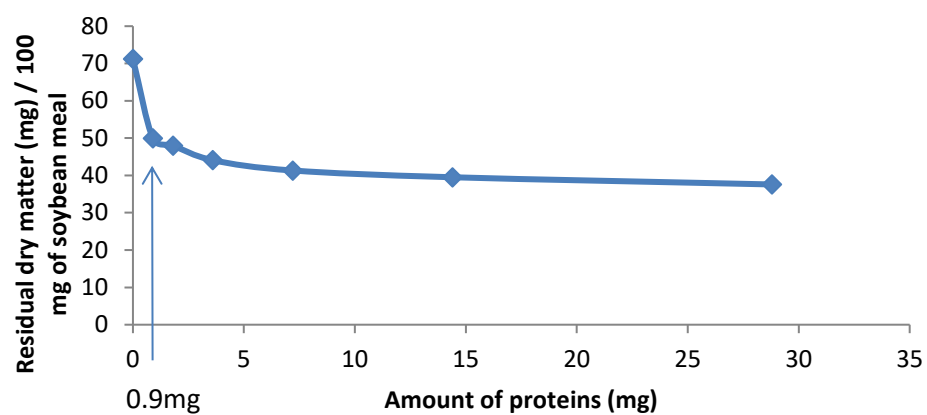

**Supplementary Figure 3: Enzymatic degradation of soybean meal by different strains of *Aspergilli*.**

Rovabio® (0.52 mg) is supplemented with 0.55 mg of secreted proteins from different strains of *Aspergilli*, cultured on SBM (Soybean Meal) or SBP (Sugar Beet Pulp). An : *Aspergillus niger* (BRFM 280); Aj: *Aspergillus japonicus* (BRFM 405) ; At: *Aspergillus terreus* (BRFM 111) ; Ab: *Aspergillus brasiliensis* (BRFM 103); Atu: *Aspergillus tubengensis* (BRFM 1521). Significance between the results was assessed using t-test (n=3) with *p* value: \*, *p* value < 0.05; \*\* *p* value < 0.01.

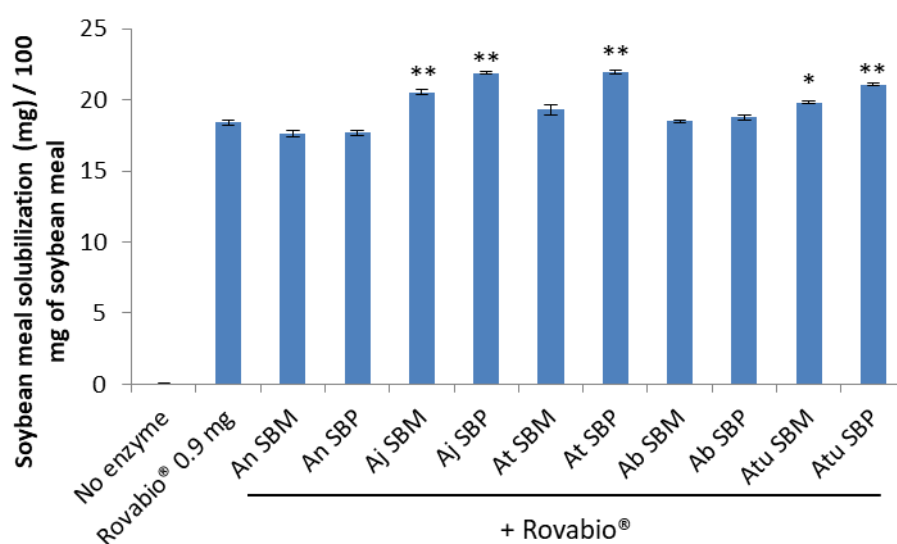

Supplement: s1 [file s1]
